# Supplementary material for: Hydride reorientation in fuel cladding under interim storage conditions with low hoop stress
Source: Copernicus journal article supplement (doi:10.5194/sand-2-191-2023), 2023-09-06
Supplement: Supplementary file 1 [file sand-2-191-2023-supplement.pdf]

Supplement of Saf. Nucl. Waste Disposal, 2, 191–192, 2023  
<https://doi.org/10.5194/sand-2-191-2023-supplement>  
© Author(s) 2023. CC BY 4.0 License.

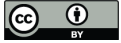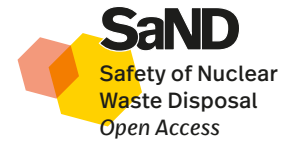

*Supplement of*

## **Hydride reorientation in fuel cladding under interim storage conditions with low hoop stress**

**Benedict Bongartz et al.**

*Correspondence to:* Benedict Bongartz ([bongartz@iw.uni-hannover.de](mailto:bongartz@iw.uni-hannover.de))

The copyright of individual parts of the supplement might differ from the article licence.

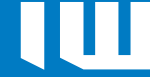

Institut für  
Werkstoffkunde

Prof. Dr.-Ing. Hans Jürgen Maier

# Hydride reorientation in fuel cladding under interim storage conditions with low hoop stress

KEK-Initiative –  
„Kompetenzerhalt in der  
Kerntechnik“

Funded by:

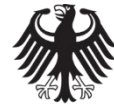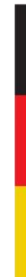

Federal Ministry for  
Economic Affairs and  
Climate Action

Lead partner:

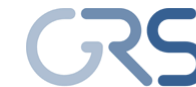

global research for safety

14 September 2023

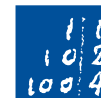

Leibniz  
Universität  
Hannover

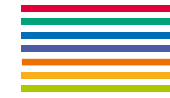

Produktionstechnisches  
Zentrum Hannover

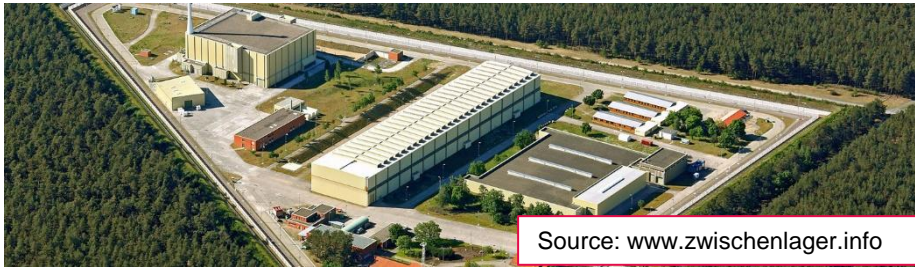

Interim storage:  
Licenced for 40 years as of first  
packaging / storage of cask, e.g. 1994 in Gorleben

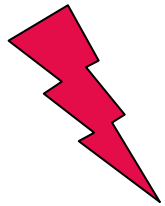

StandAG:  
Final depository found by 2031  
!Without permits or construction!

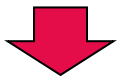

BGE estimation:  
Reasonable until 2068

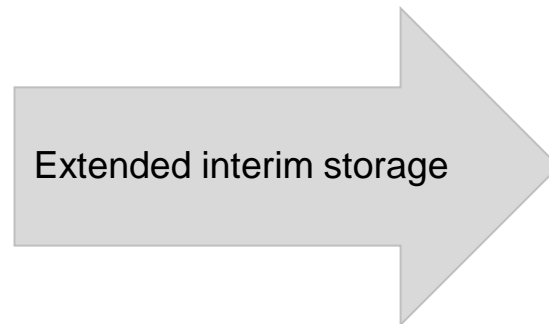

## Guideline by ESK

Need verification of cask  
and inventory safety after licensed  
timeframe, including:

- Physical framework
- Material behaviour
- Aging
- Inspection of not accessible  
components like cladding tubes, spacers etc.

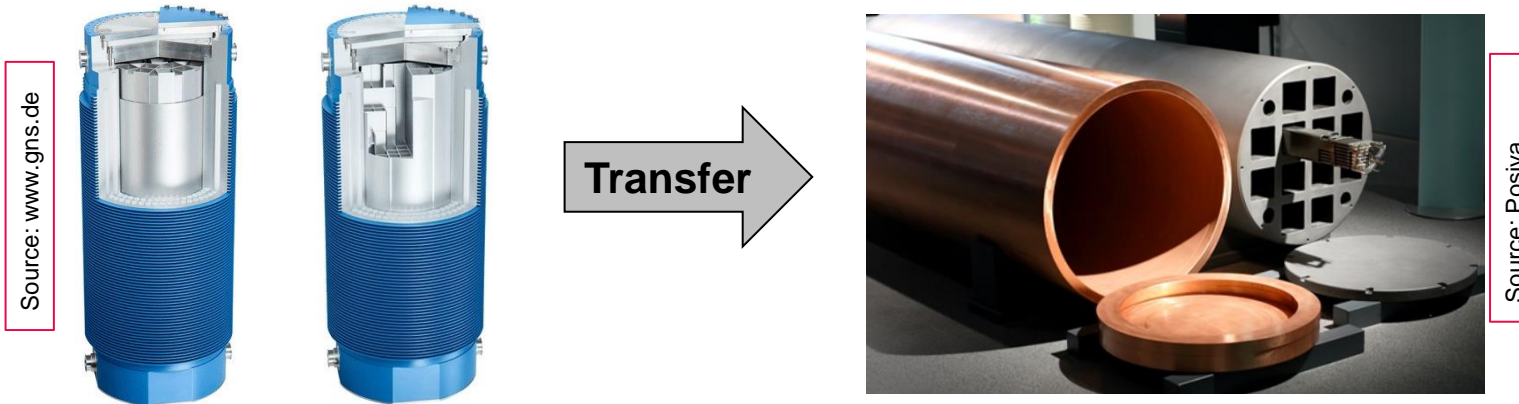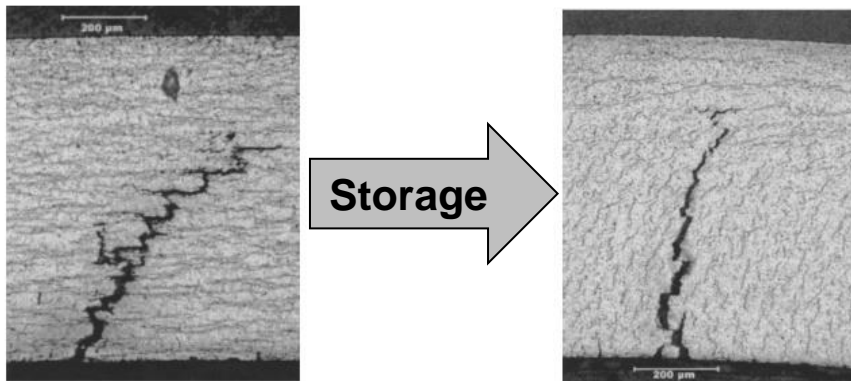

Source:  
Daum, R. S.; Majumdar, S.; Liu, Y.; Billone, C.; 2006. Radial-hydride Embrittlement of High-burnup Zircaloy-4 Fuel Cladding. *Journal of Nuclear Science and Technology*, 43:9, 1054-1067. ISSN 0022-3131

## Main considerations for extended interim storage:

- Castor storage containers likely not suitable for final storage
  - Opening of containers
  - Unknown load limits for fuel handling
- Mechanical properties of the stored fuel assemblies are in question
  - Quantity, type and orientation of hydrides
  - Changes due to creep by swelling and gas emission
  - Combination of these factors with changes by neutron flux, hardening, embrittlement

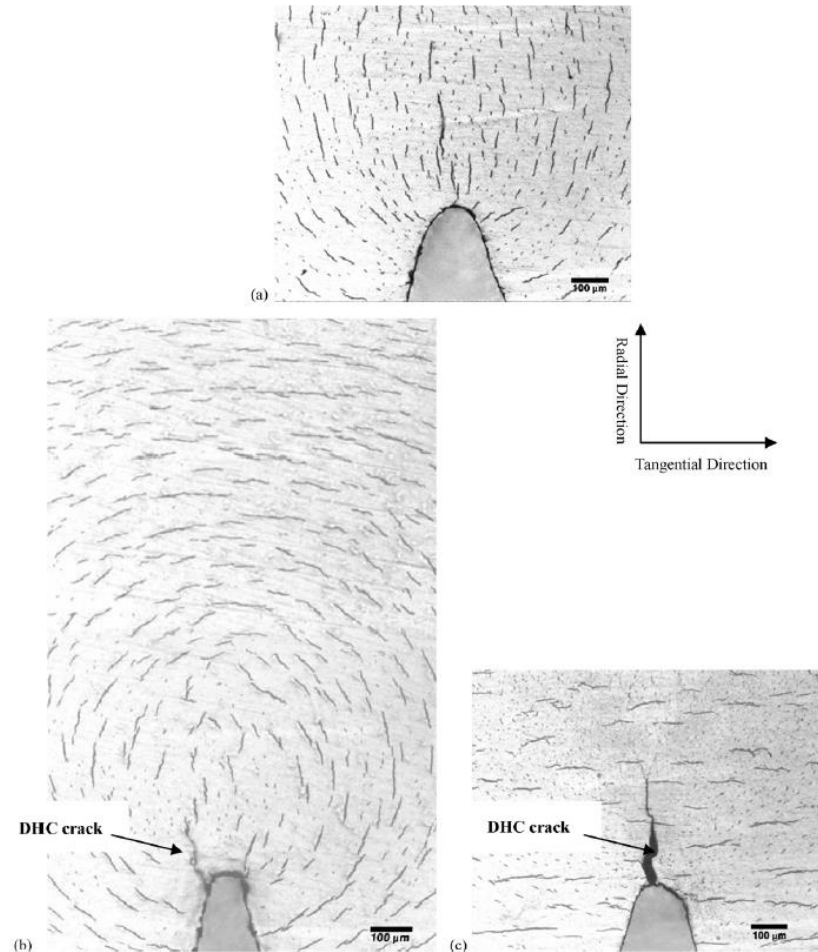

Fig. 5. Reorientation of hydrides in the Zr-2.5Nb tube with time of application of the stress intensity factor of  $18.4 \sqrt{\text{m MPa}}$  on the CB specimens during the thermal cycle treatment shown in Fig. 3: (a) at the beginning of the thermal cycle (point A in Fig. 3), (b) at the end of the holding period at the peak temperature of  $380^\circ\text{C}$  (point B in Fig. 3) and (c) at the test temperature of  $250^\circ\text{C}$  (point C in Fig. 3).

## Stress induced hydride redistribution/-orientation

- Load switch from compressive to tensile stress in cladding
- Hydrogen solved interstitially (partially with T)
- Pressure from the inside causes tensile stresses in cladding
  - Tensile stresses lead to decrease of distance between circumferential lattice planes – less energy available
  - Decrease promotes precipitation in radial direction – becomes favourable direction
- Hydrogen diffuses along stress and temperature gradients
- Diffusion might lead to prolonged hydride chains across wall

Source:  
KIM, Y.S., S.B. AHN, Y.M. CHEONG, 2007. Precipitation of crack tip hydrides in zirconium alloys [online]. *Journal of Alloys and Compounds*, 429(1-2), 221-226. ISSN 09258388

# Previous investigations: high hydrogen content

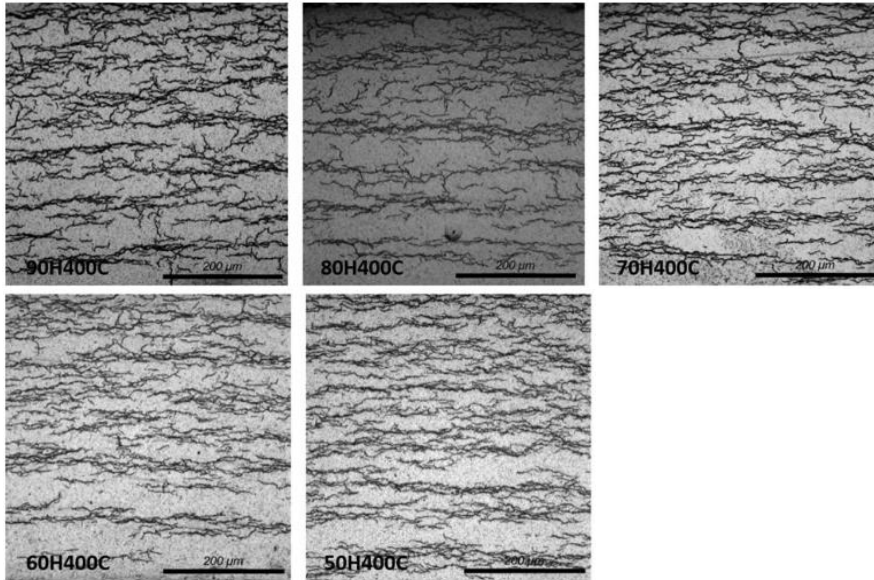

Source:  
KIM, Y.-J.; Kook, D.-H.; Kim., T.-H.; Kim, J.-S.: Stress and temperature-dependent hydride reorientation of Zircaloy-4 cladding and its effect on the ductility degradation. *Journal of Nuclear Science and Technology*, 52(5), 717-727, 2015. DOI: 10.1080/00223131.2014.978829

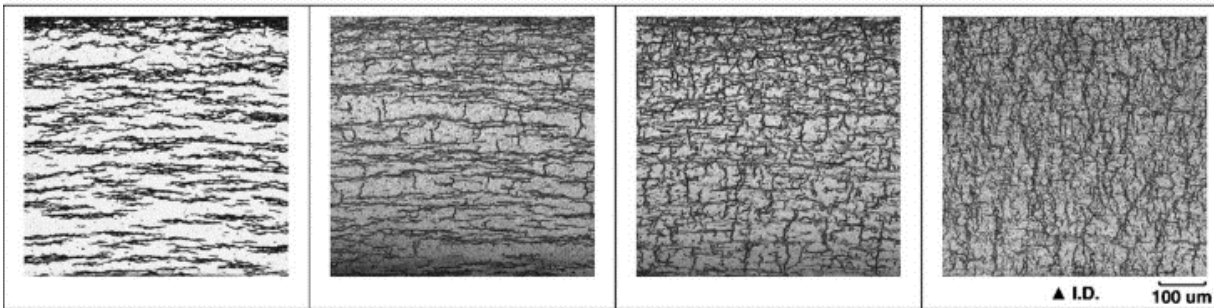

Source:  
CHU, H. C.; WU, S. K.; KUO, R. C.: Hydride reorientation in Zircaloy-4 cladding. *Journal of Nuclear Materials*, 373(1-3), 319-327, 2008. DOI: 10.1016/j.jnucmat.2007.06.012

## Reorientation parameters

- Kim:
  - Hydride content: ~ 300 ppmw
  - Stress: 50 - 90 MPa
  - Cooling rate: ~ 0.5 K/min
  
- Chu:
  - Hydride content: ~ 320 ppmw
  - Stress: 160 MPa
  - Cooling rate: ~ 1 K/min
    - Cycling 400 °C – 170 °C
    - 0 / 1 / 4 / 12 Cycles

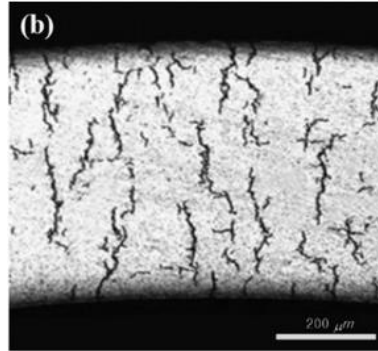

Source:  
 KIM, Y.-J.; Kook, D.-H.; Kim., T.-H.; Kim, J.-S.: Stress and temperature-dependent hydride reorientation of Zircaloy-4 cladding and its effect on the ductility degradation. *Journal of Nuclear Science and Technology*, 52(5), 717-727, 2015. DOI: 10.1080/00223131.2014.978829

## Reorientation parameters

- Kim:
  - Hydride content: ~ 137 ppmw
  - Stress: **150 MPa**
  - Cooling rate: ~ 0.5 K/min
  
- Chu:
  - Hydride content: ~ 130 ppmw
  - Stress: **160 MPa**
  - Cooling rate: ~ 1 K/min
    - Cycling 400 °C – 170 °C

| Number of thermal cycles (Annealed at 400°C under hoop stress of 160 MPa)         |                                                                                    |                                                                                    |                                                                                     |
|-----------------------------------------------------------------------------------|------------------------------------------------------------------------------------|------------------------------------------------------------------------------------|-------------------------------------------------------------------------------------|
| 0 (As-hydrided)                                                                   | 1 cycle                                                                            | 4 cycles                                                                           | 12 cycles                                                                           |
| 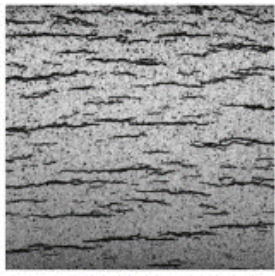 |  |  |  |

Source:  
 CHU, H. C.; WU, S. K.; KUO, R. C.: Hydride reorientation in Zircaloy-4 cladding. *Journal of Nuclear Materials*, 373(1-3), 319-327, 2008. DOI: 10.1016/j.jnucmat.2007.06.012

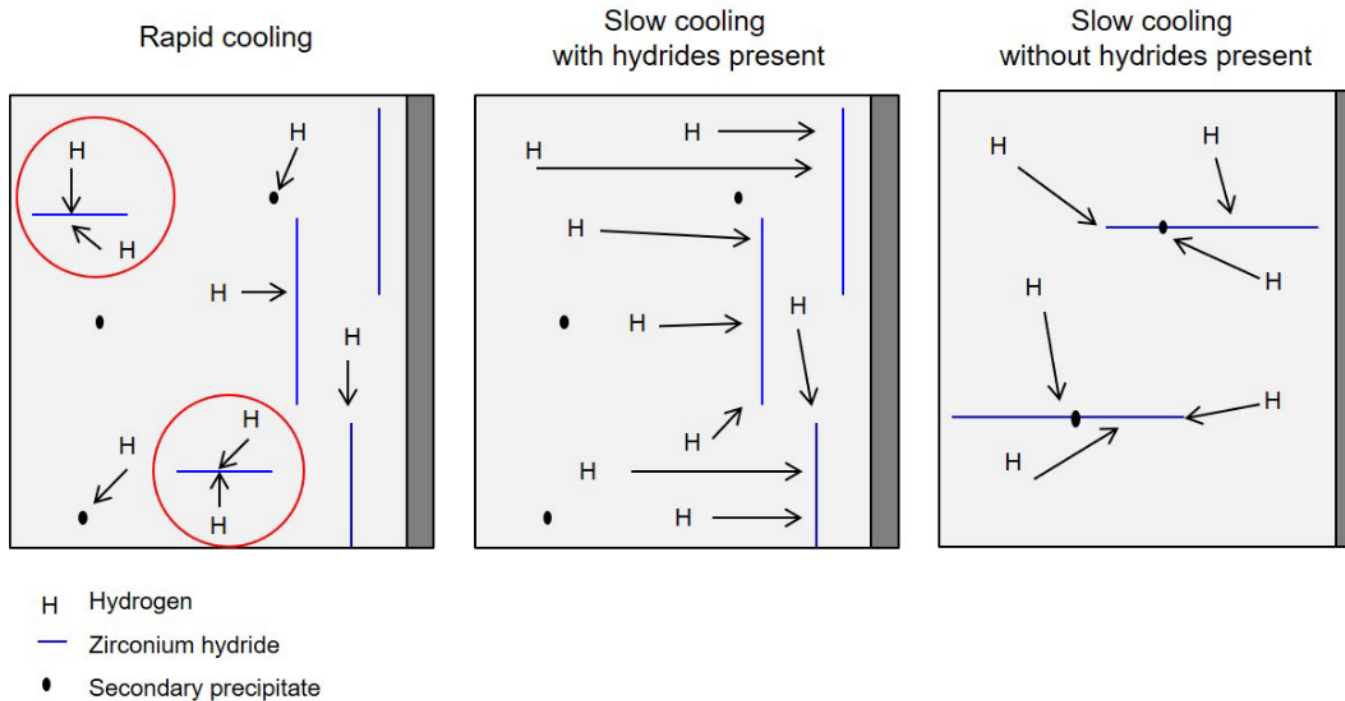

- **Rapid cooling:**
  - Supersaturation -> precipitation
  - Growth of hydrides
- **Slow cooling with hydrides:**
  - Migration to existing hydrides
  - Nucleation at existing hydrides
    - Growth of circumferential hydrides
- **Slow cooling without hydrides:**
  - Migration of hydrogen
  - Nucleation at lattice anomalies
  - Hydride growth

Source:  
KAUFHOLZ, P.; STUKE, M.; BOLDT, F.; PÉRIDIS, M.: Influence of kinetic effects on terminal solid solubility of hydrogen in zirconium alloys. *Journal of Nuclear Materials*, 510, 277-281, 2018. DOI: 10.1016/j.jnucmat.2018.08.011



# Current approach

| $\sigma_{\text{hoop}}$<br>in<br>MPa | H <sub>2</sub> -<br>content<br>in wppm | Cooling rate |       |       |       |                               |
|-------------------------------------|----------------------------------------|--------------|-------|-------|-------|-------------------------------|
| 70                                  | 100                                    | 4 K/h        | -     | -     | -     | -                             |
|                                     | 200                                    |              |       |       |       |                               |
|                                     | 300                                    |              |       |       |       |                               |
| 90                                  | 100                                    | 4 K/h        | 3 K/h | 2 K/h | 1 K/h | 200 h at<br>400 °C ><br>1 K/h |
|                                     | 200                                    |              |       |       |       |                               |
|                                     | 300                                    |              |       |       |       |                               |
| 110                                 | 100                                    | 4 K/h        | 3 K/h | 2 K/h | 1 K/h | 200 h at<br>400 °C ><br>1 K/h |
|                                     | 200                                    |              |       |       |       |                               |
|                                     | 300                                    |              |       |       |       |                               |
| 130                                 | 100                                    | 4 K/h        | 3 K/h | 2 K/h | 1 K/h | 200 h at<br>400 °C ><br>1 K/h |
|                                     | 200                                    |              |       |       |       |                               |
|                                     | 300                                    |              |       |       |       |                               |
| 150                                 | 100                                    | 4 K/h        | 3 K/h | 2 K/h | 1 K/h | 200 h at<br>400 °C ><br>1 K/h |
|                                     | 200                                    |              |       |       |       |                               |
|                                     | 300                                    |              |       |       |       |                               |

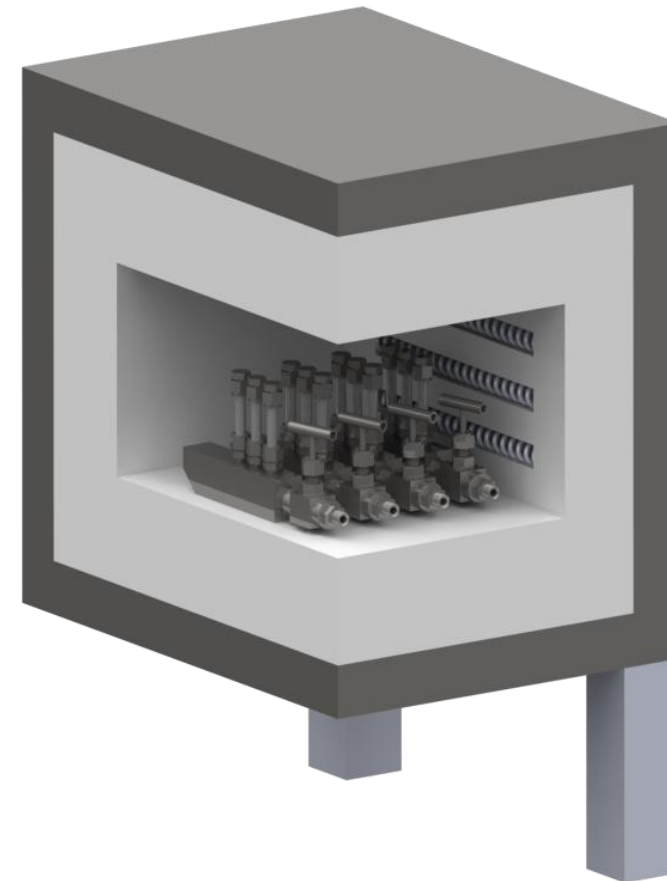

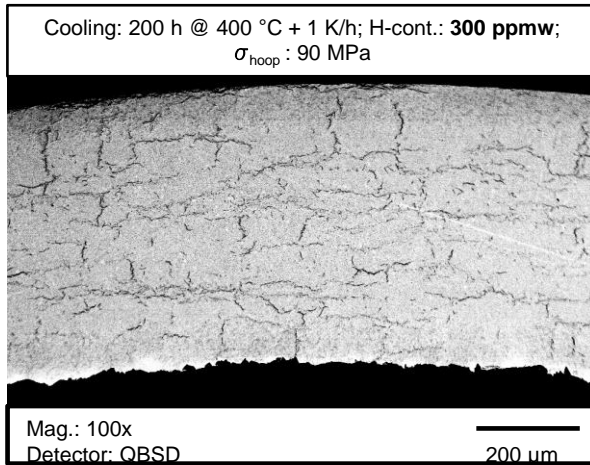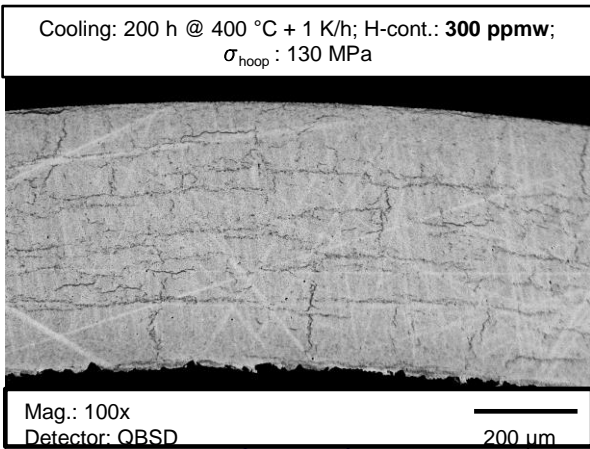

## Hydride redistribution/-orientation

- Primarily circumf. hydrides
- Small amount of radial hydrides
- Interconnection between radial and circumf.

## From Literature

- Primarily circumferential hydrides
- Small amount of radial hydrides
- Origin of radial hydrides at circumf. hydrides

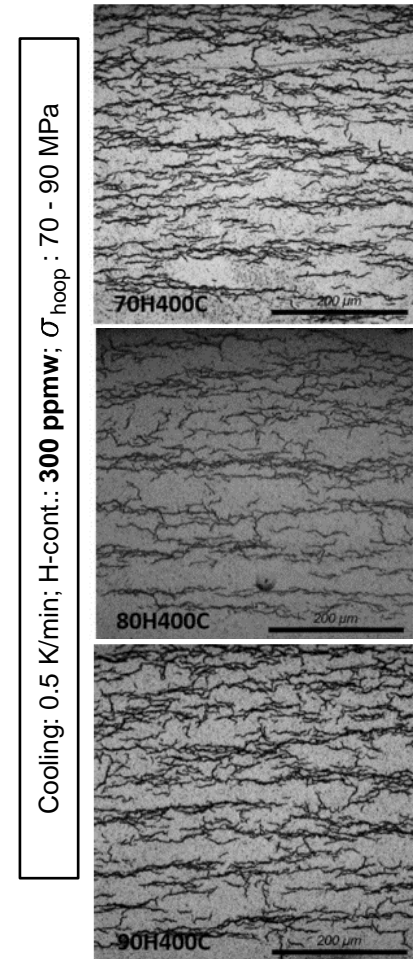

Source:  
KIM, Y.-J.; Kook, D.-H.; Kim., T.-H.; Kim, J.-S.: Stress and temperature-dependent hydride reorientation of Zircaloy-4 cladding and its effect on the ductility degradation. *Journal of Nuclear Science and Technology*, 52(5), 717-727, 2015. DOI: 10.1080/00223131.2014.978829

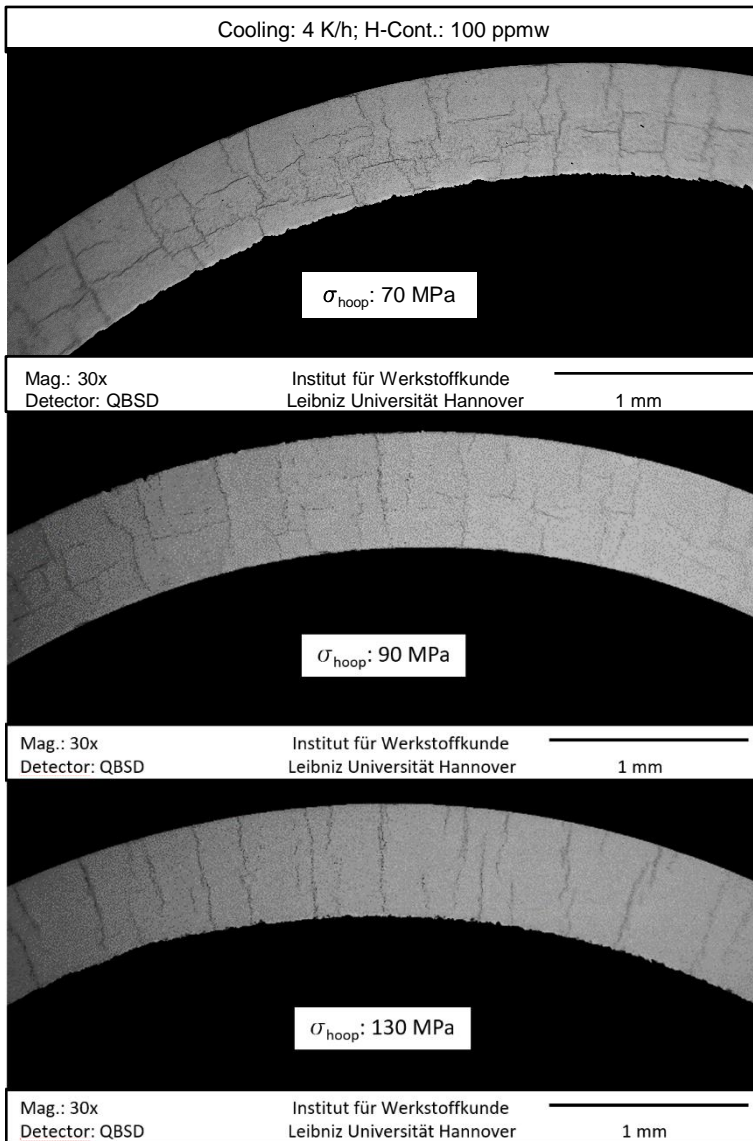

## Findings for low hydrogen:

- Stress between 70 - 90 MPa has low influence on reorientation
- Very high reorientation factors even with “high” cooling rates
- Overall high influence of H-content on reorientation factor
- Threshold for reorientation way below 70 MPa (solubility hysteresis)

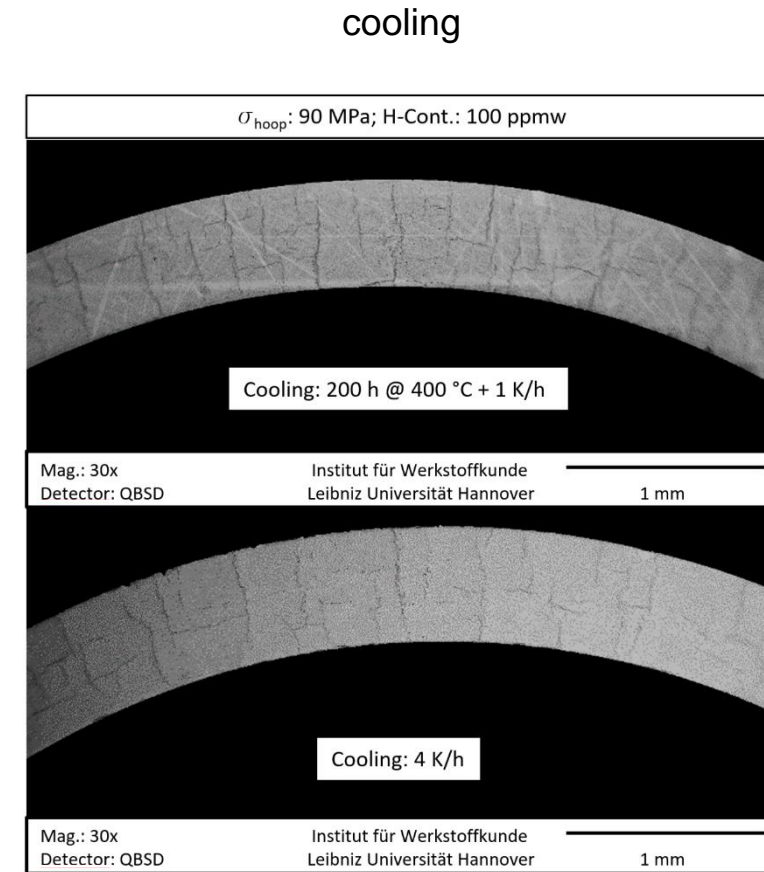

# Solution corrected precipitation

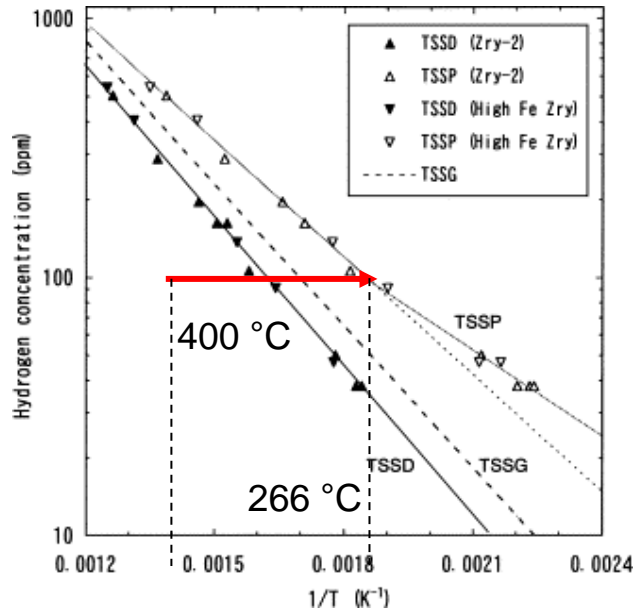

Quelle: UNE, K., ISHIMOTO, S.: DISSOLUTION AND PRECIPITATION BEHAVIOR OF HYDRIDES IN ZIRCALOY-2 AND HIGH FE ZIRCALOY. J. NUCL. MATER. 322, 66–72 (2003)

$$T_{TSSD} = \frac{36540}{R \ln \frac{1.28 \cdot 10^5}{c_H}}$$

$$T_{TSSP} = \frac{28068}{R \ln \frac{5.26 \cdot 10^4}{c_H}}$$

$$c_H = 100 \text{ ppmw}$$

Isochore conditions:

$$\frac{p_1}{p_2} = \frac{T_1}{T_2}$$

$p_1$ : Pressure before cooling (90.4 bar)

$p_2$ : Pressure after cooling (72.3 bar)

$T_1$ : Starting temperature (673.15 K)

$T_2$ : End temperature (538.8 K)

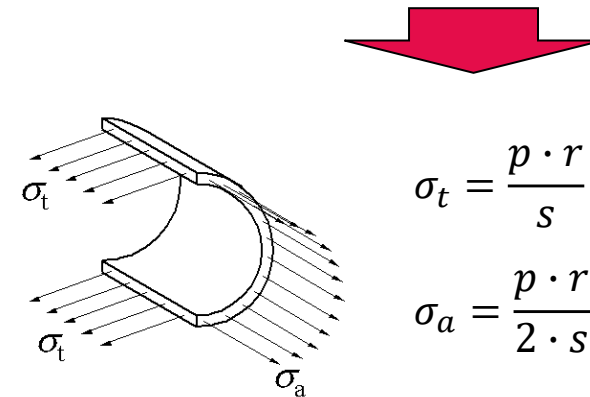

$$\sigma_t = \frac{p \cdot r}{s}$$

$\sigma_t$ : Hoop stress

$\sigma_a$ : Axial stress

$s$ : Wall thickness

$r$ : Radius

$p$ : Pressure

$$\sigma_a = \frac{p \cdot r}{2 \cdot s}$$

$$\sigma_t = \frac{7.23 \text{ MPa} \cdot 4.13 \text{ mm}}{0.57 \text{ mm}} = 52.4 \text{ MPa}$$

## Conclusions:

- Cooling rate has low influence on reorientation
- Reorientation is highly dependent on H-content
- Hypothesis by Kaufholz et al. validated
- Low contents lead to low precipitation temperatures
- Threshold for reorientation way below 70 MPa
  - Calculated around 52 MPa
- Hydrides through the wall are possible

## Ramifications:

For handling:

- Mechanical properties are to be tested
- New alloys which are designed for low H-content need to be tested for similar behaviour
- Low burnup rods are prone to this behaviour
  - Older fuels and VVER

For conditioning:

- Multi barrier system should be stabilised
  - Integrity of fuel rods
- Planning of conditioning and decommission needs reliable information for fuel properties
  - for western designs as well as VVER



Institut für  
Werkstoffkunde

Prof. Dr.-Ing. Hans Jürgen Maier

# Hydride reorientation in fuel cladding under interim storage conditions with low hoop stress

KEK-Initiative –  
„Kompetenzerhalt in der  
Kerntechnik“

Funded by:



Federal Ministry for  
Economic Affairs and  
Climate Action

Lead partner:

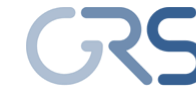

global research for safety

14 September 2023



Leibniz  
Universität  
Hannover



Produktionstechnisches  
Zentrum Hannover
